# Supplementary material for: Plant Conservation vs. Folk Traditions: The Case of Ophrys scolopax Cav. (Orchidaceae) in Central Western Spain
Source: MDPI journal article supplement (doi:10.3390/biology11111566), 2022-10-25
Supplement: s1 [file s1]

GÉNERO ..... H ☐ M ☐ / EDAD ..... años  
 NIVEL DE ESTUDIOS ..... / LUGAR DE NACIMIENTO .....

1.- ¿Conoce esta planta? ..... SÍ ☐ NO ☐

2.- ¿Cómo se llama? .....

3.- ¿Por qué recibe ese nombre? ..... n.s./n.c.  
 .....

4.- ¿Por qué o para qué tiene esta forma? ..... n.s./n.c.  
 .....

5.- ¿A qué grupo de plantas pertenece? ..... n.s./n.c.  
 Fam. ORQUÍDEAS ☐ Otros: .....

6.- ¿Dónde crece esta planta en Villarino de los Aires? .....

7.- ¿En qué época del año florece? .....

8.- ¿Cómo la conoció?, ¿desde cuándo la conoce? .....

9.- ¿Recoge, o ha recogido, esta planta? ..... SÍ ☐ NO ☐

10.- ¿Cómo la recoge, o ha recogido? .....

11.- ¿En qué cantidad la recoge, o ha recogido? .....

12.- ¿Por qué la recoge, o ha recogido? .....

13.- ¿Qué hace con los especímenes recogidos? .....

14.- ¿La recoge, o ha recogido, el Lunes de Pascua en el Teso de San Cristóbal? .....

15.- ¿Qué otro/s días la recoge, o ha recogido? .....

16.- ¿Conoce los poemas de Arturo Santos Cordero o Victoria Benito dedicados a ella? ..... SÍ ☐ NO ☐

17.- ¿Conoce la obra pictórica de Neil Allen ("el inglés") con la que ha ganado un muy prestigioso premio internacional? ..... SÍ ☐ NO ☐

**Figure S1.** Questionnaire compiled to analyse how folk traditions of Villarino de los Aires (Salamanca, Spain) affected the bee orchid *Ophrys scolopax* in the recent past.

**Table S1.** Socio-demographic characteristics of the respondents (n = 242).

| <b>Variebles</b>          | <b>Frecuency (males/females)</b> | <b>%</b> |
|---------------------------|----------------------------------|----------|
| <b>Gender</b>             |                                  |          |
| Male                      | 121                              | 50       |
| Female                    | 121                              | 50       |
| <b>Age</b>                |                                  |          |
| < 10 years                | 10 (4/6)                         | 4        |
| 10—19                     | 22 (14/8)                        | 9        |
| 20—29                     | 16 (10/6)                        | 7        |
| 30—39                     | 20 (11/9)                        | 8        |
| 40—49                     | 19 (11/8)                        | 8        |
| 50—59                     | 34 (16/18)                       | 14       |
| 60—69                     | 45 (24/21)                       | 19       |
| 70—79                     | 41 (17/24)                       | 17       |
| 80—89                     | 22 (7/15)                        | 9        |
| 90—99                     | 13 (7/6)                         | 5        |
| <b>Educational status</b> |                                  |          |
| Primary                   | 161 (72/89)                      | 67       |
| Secondary (and Higher)    | 81 (49/32)                       | 33       |
